# Supplementary material for: FvbHLH1 Regulates the Accumulation of Phenolic Compounds in the Yellow Cap of Flammulina velutipes
Source: MDPI journal article supplement (doi:10.3390/jof9111063), 2023-10-30
Supplement: s1 [file s1]

Table S1. Oligo nucleotide primers used in this work

| Gene      | Forward primer(5'-3')                 | Reverse primer(5'-3')                   | Function                               |
|-----------|---------------------------------------|-----------------------------------------|----------------------------------------|
| FvbHLH1-1 | ATGGTCATGTCGCTCCCAAC                  | CTACATCATGGCAAAATTGGA                   | Cloning <i>FvbHLH1</i> cDNAs and gDNA  |
| FvbHLH1-2 | GGgatccATGGTCATGTCGCTC<br>CCCAACCCCAG | GGtcgagaCTACATCATGGCAA<br>ATTGGCAATATCC | Construction of 35S- <i>FvbHLH1</i>    |
| FvbHLH1-3 | CAATCACCGCTCTCGTCCGCG                 | CTACATCATGGCAAAATTGGCA                  | Cloning <i>FvbHLH1</i> promoter        |
| NtActin   | AATGATCGGAATGGAAGCTG                  | TGGTACCACCACTGAGGACA                    |                                        |
| NtPAL     | ATGCTAAAACTGTAA                       | CTTGGTTCTCCTATG                         |                                        |
| NtC4H     | TGAGTTTGATTTTGG                       | GATTTCCTCCTTCTG                         |                                        |
| Nt4CL     | TTTCTTTCTTGGAGT                       | ATGACGGTTCTTACT                         |                                        |
| NtMYC2    | TCCGTCTTCTTGTC                        | CGGTGTTCTTGCTCA                         | Amplifying Tobacco Actin gene transe   |
| NtF5H     | AGATGAGAAAAGTGTGTG                    | TAGCAAGAGTGGTGAATA                      | ripts (as internal control of qRT-PCR) |
| NtCoMT    | TCTCAACTCAGAACCCAG                    | GCAACAGAAACACCATCA                      |                                        |
| NtCalB    | ATGGCGACGCTTGAATACAC                  | TCGCCGATGGTGGGTCCAAT                    |                                        |
