# Supplementary material for: FvbHLH1 Regulates the Accumulation of Phenolic Compounds in the Yellow Cap of Flammulina velutipes
Source: MDPI journal article supplement (doi:10.3390/jof9111063), 2023-10-30
Supplement: s1 [file s1]

Table S7. The relative transcript level of the unigenes relative to Phenylalanine, tyrosine and tryptophan biosynthesis

| Structural gene | GeneID              | Length | white-expression | yellow-expression | log2FoldChange(yellow/white) | Up/Down-Regulation | Sum of Log2 |
|-----------------|---------------------|--------|------------------|-------------------|------------------------------|--------------------|-------------|
| PAL             | CL3691.Contig2_All  | 3003   | 0.442323         | 2993.154          | 12.72428                     | Up                 | 15          |
|                 | CL3691.Contig4_All  | 2979   | 622.1693         | 3022.567          | 2.280395                     | Up                 |             |
| C4H             | Unigene27196_All    | 411    | 0.334439         | 1.332035          | 1.993816                     | *                  | 1.99        |
|                 | Unigene12973_All    | 1697   | 39.34255         | 26.2812           | 0.244378                     | *                  |             |
|                 | Unigene12976_All    | 1891   | 0.289143         | 34.65341          | 6.905072                     | Up                 |             |
| C3H             | CL3508.Contig3_All  | 2332   | 6181.362         | 5134.318          | -0.26775                     | *                  | 1.36        |
|                 | CL3508.Contig2_All  | 2183   | 281.1041         | 562.2962          | 1.000226                     | Up                 |             |
|                 | Unigene12972_All    | 1715   | 5.837032         | 4.074761          | 0.713639                     | *                  |             |
|                 | Unigene12971_All    | 1721   | 1.013321         | 0.273802          | 0.403418                     | *                  |             |
|                 | Unigene2916_All     | 3744   | 46.3737          | 27.97909          | -0.72896                     | *                  |             |
|                 | Unigene2910_All     | 3183   | 616.6343         | 988.5564          | 0.680908                     | *                  |             |
|                 | CL1458.Contig1_All  | 1723   | 82.77354         | 130.1623          | 0.65307                      | *                  |             |
|                 | Unigene2909_All     | 5797   | 189.735          | 253.6515          | 0.418862                     | *                  |             |
|                 | Unigene2907_All     | 3184   | 9.499301         | 1.289609          | -2.88089                     | *                  |             |
|                 | Unigene2907_All     | 3184   | 9.499301         | 1.289609          | -2.88089                     | *                  |             |
| CoMT            | Unigene17080_All    | 3693   | 200.3534         | 32.04092          | -2.64456                     | Down               | 13.52       |
|                 | Unigene2905_All     | 5719   | 797.6435         | 169.8751          | -2.23127                     | Down               |             |
|                 | Unigene2911_All     | 3121   | 1153.687         | 528.5393          | -1.12617                     | Down               |             |
|                 | Unigene2913_All     | 3169   | 0.379436         | 201.1935          | 9.050511                     | Up                 |             |
|                 | Unigene2912_All     | 3127   | 0.402114         | 1033.06           | 11.32703                     | Up                 |             |
|                 | Unigene2908_All     | 3070   | 43.42445         | 644.2152          | 3.890963                     | Up                 |             |
|                 | CL13674.Contig4_All | 1706   | 0.998528         | 914.8328          | 9.83949                      | Up                 |             |
| calB            | CL13674.Contig3_All | 1959   | 267.119          | 327.5751          | 0.294343                     | *                  | 10.07       |

|     |                     |      |          |          |          |      |       |
|-----|---------------------|------|----------|----------|----------|------|-------|
|     | CL13674.Contig2_All | 1875 | 836.5163 | 513.3183 | -0.70454 | *    |       |
|     | CL13674.Contig1_All | 1950 | 330.8781 | 518.4085 | 0.64779  | *    |       |
|     | CL8683.Contig6_All  | 1709 | 264.6909 | 65.22786 | -2.02075 | Down |       |
|     | CL8683.Contig1_All  | 1810 | 551.7176 | 1136.496 | 1.04259  | Up   |       |
| F5H | CL15078.Contig3_All | 2020 | 1182.398 | 829.9538 | -0.51061 | *    | 15.45 |
|     | CL15078.Contig2_All | 1947 | 1.633497 | 1051.264 | 9.329945 | Up   |       |
|     | CL15078.Contig1_All | 1995 | 0.314531 | 61.69547 | 7.615821 | Up   |       |
|     | Unigene18009_All    | 4108 | 1.61458  | 689.6841 | 8.738633 | Up   |       |
|     | CL9008.Contig6_All  | 5345 | 2300.055 | 371.6414 | -2.62969 | Down |       |
|     | CL9008.Contig5_All  | 5342 | 125.9634 | 53.86931 | -1.22547 | Down |       |
| 4CL | Unigene36077_All    | 2210 | 1.892833 | 22.59112 | 3.577137 | Up   | 14.63 |
|     | CL5715.Contig1_All  | 2006 | 566.7678 | 277.6832 | -1.02932 | Down |       |
|     | CL13311.Contig2_All | 2024 | 0.296097 | 61.86351 | 7.706876 | Up   |       |
|     | CL5715.Contig2_All  | 1922 | 36.82474 | 26.06918 | -0.49833 | *    |       |
