# Supplementary material for: FvbHLH1 Regulates the Accumulation of Phenolic Compounds in the Yellow Cap of Flammulina velutipes
Source: MDPI journal article supplement (doi:10.3390/jof9111063), 2023-10-30
Supplement: s1 [file s1]

Table S4. Distribution of the lengths of the assembled unigenes

| Sample   | Total<br>Number | Total<br>Length | Mean<br>Length | N50  | N70  | N90 | GC(%) |
|----------|-----------------|-----------------|----------------|------|------|-----|-------|
| white 1  | 27296           | 42563326        | 1559           | 2228 | 1604 | 883 | 51.24 |
| white 2  | 27982           | 44539778        | 1591           | 2275 | 1632 | 899 | 51.22 |
| white 3  | 29968           | 45318413        | 1512           | 2244 | 1599 | 838 | 51.17 |
| yellow 1 | 36471           | 53377683        | 1463           | 2106 | 1532 | 824 | 51.12 |
| yellow 2 | 35697           | 52695747        | 1476           | 2104 | 1535 | 840 | 51.15 |
| yellow 3 | 34438           | 51749840        | 1502           | 2112 | 1543 | 863 | 51.18 |
