# Supplementary material for: FvbHLH1 Regulates the Accumulation of Phenolic Compounds in the Yellow Cap of Flammulina velutipes
Source: MDPI journal article supplement (doi:10.3390/jof9111063), 2023-10-30
Supplement: s1 [file s1]

Table S3. Summary of transcriptome sequencing data in the white and yellow

| Sample   | Total Raw<br>Reads(M) | Total Clean<br>Reads(M) | Total Clean<br>Bases(Gb) | Clean Reads<br>Q20(%) | Clean Reads<br>Q30(%) | Clean<br>Reads<br>Ratio(%) |
|----------|-----------------------|-------------------------|--------------------------|-----------------------|-----------------------|----------------------------|
| white 1  | 38.12                 | 38.12                   | 5.72                     | 98.72                 | 95.81                 | 100                        |
| white 2  | 41.48                 | 41.48                   | 6.22                     | 98.62                 | 95.61                 | 100                        |
| white 3  | 40.79                 | 40.79                   | 6.12                     | 98.53                 | 95.54                 | 99.99                      |
| yellow 1 | 39.86                 | 39.86                   | 5.98                     | 98.52                 | 95.45                 | 99.99                      |
| yellow 2 | 41.83                 | 41.83                   | 6.27                     | 98.64                 | 95.8                  | 99.99                      |
| yellow 3 | 40.23                 | 40.23                   | 6.03                     | 98.62                 | 95.56                 | 100                        |
