# Supplementary material for: FvbHLH1 Regulates the Accumulation of Phenolic Compounds in the Yellow Cap of Flammulina velutipes
Source: MDPI journal article supplement (doi:10.3390/jof9111063), 2023-10-30
Supplement: s1 [file s1]

Table S5. The annotation of assembled unigenes

| Values     | Nr      | Nt     | Swissprot | KEGG    | KOG     | Pfam    | GO     | Intersection | Overall |
|------------|---------|--------|-----------|---------|---------|---------|--------|--------------|---------|
| Number     | 162,413 | 36,975 | 106,171   | 116,156 | 101,874 | 139,184 | 57,053 | 13,824       | 166,873 |
| Percentage | 84.97%  | 19.34% | 55.55%    | 60.77%  | 53.30%  | 72.82%  | 29.85% | 7.23%        | 87.30%  |
